# Supplementary material for: Cognition and Behavior of COVID-19 Vaccination Based on the Health Belief Model: A Cross-Sectional Study
Source: Vaccines (Basel). 2022 Apr 1;10(4):544. doi: 10.3390/vaccines10040544 (PMC9030847; doi:10.3390/vaccines10040544)
Supplement: Supplementary file 1 [file vaccines-10-00544-s001.zip › vaccines-1634290-supplementary.pdf]

## Supplementary materials

**Table S1.** Items Based on HBM Constructs.

| HBM<br>Constructs           | Items                                                                                                                                                                                                                                                                                                                                                                                                                                                                                                                                                                                                                                                   |
|-----------------------------|---------------------------------------------------------------------------------------------------------------------------------------------------------------------------------------------------------------------------------------------------------------------------------------------------------------------------------------------------------------------------------------------------------------------------------------------------------------------------------------------------------------------------------------------------------------------------------------------------------------------------------------------------------|
| Perceived<br>susceptibility | 1.How likely do you think you will get COVID-19 in the coming 12 months?<br>2.I believe that if I do not get vaccinated, the likelihood of me getting infected with corona will increase.<br>3.I believe that if I do not get vaccinated, the likelihood of my family and relatives getting infected in Corona will increase.                                                                                                                                                                                                                                                                                                                           |
| Perceived<br>severity       | 1.If you get COVID-19, how serious do you think the consequences will be?<br>2.What is the possibility of having long-term health or economic sequelae if getting COVID-19?<br>3.If children/the elderly get COVID-19, how serious do you think the consequences will be?                                                                                                                                                                                                                                                                                                                                                                               |
| Perceived<br>benefits       | 1. Do you think COVID-19 vaccine can reduce the chance of infection?<br>2. Do you think COVID-19 vaccine can decrease the severity and the chance of having complications if people are infected?<br>3. Do you think COVID-19 vaccine can prevent people from spreading the virus to others?                                                                                                                                                                                                                                                                                                                                                            |
| Perceived<br>barriers       | 1. The COVID-19 vaccine causes a person to get COVID-19.<br>2. People will have serious sequelae after getting the COVID-19 vaccine.<br>3. Getting vaccinated requires time and effort.                                                                                                                                                                                                                                                                                                                                                                                                                                                                 |
| Cues to action              | 1. The chances of me getting vaccinated against COVID-19 will increase if opinion leaders on social media express support for the benefit of the vaccine.<br>2. The chances of me getting vaccinated against COVID-19 will increase if friends and family express support for the benefit of the vaccine.<br>3. The chances of me getting vaccinated against COVID-19 will increase if official guidelines from the Ministry of Health are published.<br>4. The chances of me getting vaccinated against COVID-19 will increase if my GP recommends me.<br>5. If my workplace takes care of vaccinating the workers against COVID-19, I will vaccinate. |
| Health<br>Behavior          | 1. I exercise as recommended for my age.<br>2. I make sure to eat a healthy and varied diet.<br>3. I have a good sleep habit.                                                                                                                                                                                                                                                                                                                                                                                                                                                                                                                           |

Score each of the items from 1 (completely disagree) to 5 (agree completely).
